# Supplementary material for: Relationship between Serum and Brain Carotenoids,α-Tocopherol, and Retinol Concentrations and Cognitive Performance in the Oldest Old from the Georgia Centenarian Study
Source: Hindawi journal article supplement (doi:10.1155/2013/951786), 2013-01-01
Supplement: f1 [file 951786.f1.pdf]

**Table S1.** Cognitive tests used in the Georgia Centenarian Study.

| Test                                                                | Assessment                                                                    | Description                                                                                                 | Ref.              |
|---------------------------------------------------------------------|-------------------------------------------------------------------------------|-------------------------------------------------------------------------------------------------------------|-------------------|
| Mini-Mental State Examination                                       | Global cognitive performance                                                  | A brief screening of orientation, memory, executive function, language, praxis                              | (1)               |
| Global Deterioration Rating Scale                                   | Dementia severity                                                             | Rating scale of dementia stages                                                                             | (2)               |
| Severe Impairment Battery                                           | Global cognitive performance (significantly cognitively impaired individuals) | Direct performance-based assessment of a variety of low-level tasks                                         | (3)               |
| Fuld Object Memory Evaluation                                       |                                                                               |                                                                                                             |                   |
| delayed recall                                                      | delayed recall                                                                | Number of objects recalled after a 20 min delay                                                             | (4)               |
| delayed recognition                                                 | delayed recognition                                                           | Objects not recalled that were recognized                                                                   |                   |
| delayed retention                                                   | delayed retention                                                             | Sum of delayed recall and recognition                                                                       |                   |
| Controlled Oral Word Association Test                               | Verbal fluency                                                                | Participants are required to name as many words as they can in one minute                                   | Adapted from: (5) |
| WAIS-III Similarities                                               | Concept formation, abstraction                                                | Participants are given a series of comparisons and are asked how two things are alike                       | (6)               |
| Behavioral Dyscontrol Scale                                         | Executive function                                                            | A brief multidimensional screening of working memory, motor learning, and behavioral inhibition             | (7)               |
| Geriatric Depression Scale - Short Form                             | Depressive symptoms                                                           | Participants are asked a series of questions about how they felt over the past week.                        | (8)               |
| Direct Assessment of Functional Status                              | Cognitive and behavioral functional status                                    | Behavioral rating scale that directly assesses functional capacity                                          | (9)               |
| CERAD (Consortium to Establish a Registry for Alzheimer's Disease): | Clinical evidence for dementia                                                | Standardized procedure for the clinical evaluation and diagnosis of patients with Alzheimer's disease (AD). | (10)              |

Verbal Fluency  
Boston Naming Test  
Mini-Mental State Examination  
Constructional Praxis  
Word List Memory

---

**Table S2.** Cognitive function status in subjects from the Georgia Centenarian Study (mean  $\pm$  SD).

|                                                                | $\geq 80$ to $\leq 89$ y<br>(n=78) | $\geq 98$ y<br>(n=220) | <i>P</i> value* | Community<br>dwelling<br>(n=150) | Institutionalized<br>(n=148) | <i>P</i> value* | Total<br>(n=298) |
|----------------------------------------------------------------|------------------------------------|------------------------|-----------------|----------------------------------|------------------------------|-----------------|------------------|
| Mini Mental State Examination                                  | 24.6 $\pm$ 7.8                     | 16.5 $\pm$ 8.7         | <.0001          | 23.1 $\pm$ 6.8                   | 13.8 $\pm$ 9.0               | <.0001          | 18.4 $\pm$ 9.3   |
| Global Deterioration Rating Scale                              | 2.4 $\pm$ 1.4                      | 4.0 $\pm$ 1.7          | <.0001          | 3.0 $\pm$ 1.5                    | 4.5 $\pm$ 1.7                | <.0001          | 3.7 $\pm$ 1.8    |
| FOME‡ Delayed Recall                                           | 6.4 $\pm$ 3.1                      | 3.0 $\pm$ 3.1          | <.0001          | 5.5 $\pm$ 3.2                    | 2.3 $\pm$ 2.8                | <.0001          | 3.9 $\pm$ 3.4    |
| FOME Delayed Recognition                                       | 2.4 $\pm$ 2.0                      | 3.1 $\pm$ 2.4          | 0.6547          | 3.2 $\pm$ 2.1                    | 2.7 $\pm$ 2.6                | 0.0004          | 3.0 $\pm$ 2.4    |
| FOME Delayed Retention                                         | 8.7 $\pm$ 3.2                      | 6.1 $\pm$ 4.0          | 0.0003          | 8.6 $\pm$ 2.8                    | 4.9 $\pm$ 4.2                | <.0001          | 6.7 $\pm$ 4.0    |
| Controlled Oral Word Association<br>Test                       | 7.9 $\pm$ 4.8                      | 4.1 $\pm$ 3.6          | <.0001          | 6.9 $\pm$ 4.4                    | 3.3 $\pm$ 3.4                | <.0001          | 5.1 $\pm$ 4.3    |
| Wechsler Adult Intelligence Scale-<br>III Similarities subtest | 15.2 $\pm$ 8.9                     | 7.2 $\pm$ 8.1          | <.0001          | 13.3 $\pm$ 8.8                   | 5.2 $\pm$ 7.2                | <.0001          | 9.2 $\pm$ 9.0    |
| Behavioral Dyscontrol Scale<br>Total Score                     | 14.9 $\pm$ 5.7                     | 8.5 $\pm$ 6.4          | <.0001          | 13.0 $\pm$ 6.1                   | 7.0 $\pm$ 6.5                | <.0001          | 1.0 $\pm$ 7.0    |

‡FOME: Fuld Object Memory Evaluation; \*Significant difference between groups. Means were compared using Student's t-test.

**Table S3.** Partial correlation coefficients between cognition indices and serum carotenoids,  $\alpha$ -tocopherol and retinol in octogenarians and centenarians (adjusted with age, sex, education years, BMI, smoking, alcohol, hypertension and diabetes).

|                                         | Mini Mental State Exam | Global Deterioration Rating Scale | FOME <sup>1</sup> Delayed Recall | FOME Delayed Recognition | FOME Delayed Retention | Controlled Oral Word Association Test | WAIS-III Similarities Subtest <sup>2</sup> | Behavioral Dyscontrol Scale Total Score |
|-----------------------------------------|------------------------|-----------------------------------|----------------------------------|--------------------------|------------------------|---------------------------------------|--------------------------------------------|-----------------------------------------|
| OCTOGENARIANS, n = 78                   |                        |                                   |                                  |                          |                        |                                       |                                            |                                         |
| Lutein, ( <i>trans+cis</i> )            | 0.227 <sup>a</sup>     | -0.258 <sup>a</sup>               | 0.172                            | -0.009                   | 0.137                  | 0.042                                 | 0.084                                      | 0.196 <sup>a</sup>                      |
| Zeaxanthin, ( <i>trans+cis</i> )        | 0.135                  | -0.059                            | -0.026                           | -0.079                   | -0.021                 | -0.087                                | 0.069                                      | 0.078                                   |
| Cryptoxanthin                           | -0.156                 | 0.174                             | -0.189                           | -0.026                   | -0.105                 | -0.17                                 | -0.063                                     | -0.156                                  |
| $\alpha$ -Carotene                      | -0.014                 | 0.105                             | -0.016                           | -0.022                   | 0.013                  | -0.059                                | -0.033                                     | -0.014                                  |
| $\beta$ -Carotene, ( <i>trans+cis</i> ) | 0.024                  | 0.007                             | 0.035                            | 0.054                    | 0.073                  | 0.029                                 | 0.031                                      | 0.032                                   |
| Lycopene, ( <i>trans+cis</i> )          | 0.056                  | 0.019                             | -0.063                           | -0.091                   | -0.069                 | -0.034                                | -0.024                                     | 0.005                                   |
| $\alpha$ -Tocopherol                    | -0.065                 | 0.022                             | -0.026                           | -0.002                   | -0.027                 | 0.004                                 | 0.108                                      | -0.065                                  |
| Retinol                                 | 0.058                  | 0.033                             | -0.006                           | 0.072                    | 0.039                  | -0.123                                | -0.031                                     | 0.091                                   |
| CENTENARIANS, n = 220                   |                        |                                   |                                  |                          |                        |                                       |                                            |                                         |
| Lutein, ( <i>trans+cis</i> )            | 0.066                  | -0.364 <sup>b</sup>               | 0.164 <sup>a</sup>               | -0.007                   | 0.094                  | 0.157 <sup>a</sup>                    | 0.266 <sup>b</sup>                         | 0.153 <sup>a</sup>                      |
| Zeaxanthin, ( <i>trans+cis</i> )        | 0.085                  | -0.233 <sup>c</sup>               | 0.139                            | 0.084                    | 0.157 <sup>a</sup>     | 0.188 <sup>a</sup>                    | 0.182 <sup>a</sup>                         | 0.181 <sup>a</sup>                      |
| Cryptoxanthin                           | 0.047                  | -0.130                            | 0.104                            | 0.026                    | 0.078                  | 0.056                                 | 0.152 <sup>a</sup>                         | 0.064                                   |
| $\alpha$ -Carotene                      | 0.009                  | -0.133                            | 0.045                            | -0.003                   | 0.038                  | 0.044                                 | 0.107                                      | 0.062                                   |
| $\beta$ -Carotene, ( <i>trans+cis</i> ) | 0.042                  | -0.285 <sup>b</sup>               | 0.203 <sup>b</sup>               | 0.091                    | 0.190 <sup>c</sup>     | 0.211 <sup>c</sup>                    | 0.157 <sup>a</sup>                         | 0.240 <sup>c</sup>                      |
| Lycopene, ( <i>trans+cis</i> )          | -0.074                 | -0.133                            | -0.031                           | -0.030                   | 0.005                  | -0.009                                | 0.108                                      | 0.015                                   |

|                      |       |                     |                    |       |                    |       |       |                    |
|----------------------|-------|---------------------|--------------------|-------|--------------------|-------|-------|--------------------|
| $\alpha$ -Tocopherol | 0.108 | -0.213 <sup>c</sup> | 0.107              | 0.088 | 0.162 <sup>a</sup> | 0.114 | 0.09  | 0.228 <sup>c</sup> |
| Retinol              | 0.100 | -0.109              | 0.150 <sup>a</sup> | 0.012 | 0.124              | 0.068 | 0.081 | 0.114              |

---

<sup>1</sup>FOME: Fuld Object Memory Evaluation; <sup>2</sup>WAIS-III Similarities subtest: Wechsler Adult Intelligence Scale-III Similarities subtest

Significantly related ( $P <$ ): <sup>a</sup>0.05, <sup>b</sup>0.001, <sup>c</sup>0.01

**Table S4.** Partial correlation coefficients between cognition indices and serum carotenoids,  $\alpha$ -tocopherol and retinol in community dwelling (n = 150) and institutionalized subjects (n = 148), 80 -89 and  $\geq 98$  yrs (adjusted w/ age, sex, education years, BMI, smoking, alcohol, hypertension and diabetes).

|                                         | Mini Mental State Exam | Global Deterioration Rating Scale | FOME <sup>1</sup> Delayed Recall | FOME Delayed Recognition | FOME Delayed Retention | Controlled Oral Word Association Test | WAIS-III Similarities subtest <sup>2</sup> | Behavioral Dyscontrol Scale Total Score |
|-----------------------------------------|------------------------|-----------------------------------|----------------------------------|--------------------------|------------------------|---------------------------------------|--------------------------------------------|-----------------------------------------|
| COMMUNITY DWELLING, n = 150             |                        |                                   |                                  |                          |                        |                                       |                                            |                                         |
| Lutein, ( <i>trans+cis</i> )            | 0.220 <sup>a</sup>     | -0.330 <sup>b</sup>               | 0.198 <sup>a</sup>               | -0.001                   | 0.190 <sup>a</sup>     | 0.164                                 | 0.112                                      | 0.113                                   |
| Zeaxanthin, ( <i>trans+cis</i> )        | 0.389 <sup>b</sup>     | -0.249 <sup>c</sup>               | 0.172 <sup>a</sup>               | 0.039                    | 0.214 <sup>a</sup>     | 0.191 <sup>a</sup>                    | 0.172 <sup>a</sup>                         | 0.164                                   |
| Cryptoxanthin                           | 0.01                   | -0.165                            | 0.005                            | -0.091                   | -0.04                  | -0.041                                | 0.086                                      | 0.04                                    |
| $\alpha$ -Carotene                      | -0.016                 | -0.075                            | 0.023                            | -0.075                   | 0.042                  | -0.005                                | -0.029                                     | 0.021                                   |
| $\beta$ -Carotene, ( <i>trans+cis</i> ) | 0.139                  | -0.224 <sup>c</sup>               | 0.193 <sup>a</sup>               | 0.136                    | 0.313 <sup>b</sup>     | 0.262 <sup>c</sup>                    | 0.094                                      | 0.286 <sup>b</sup>                      |
| Lycopene, ( <i>trans+cis</i> )          | 0.240 <sup>d</sup>     | -0.195 <sup>a</sup>               | 0.032                            | -0.006                   | 0.136                  | 0.126                                 | 0.089                                      | 0.121                                   |
| $\alpha$ -Tocopherol                    | 0.147                  | -0.179 <sup>a</sup>               | 0.076                            | 0.071                    | 0.145                  | 0.133                                 | 0.155                                      | 0.189 <sup>a</sup>                      |
| Retinol                                 | 0.094                  | -0.060                            | 0.091                            | 0.048                    | 0.128                  | -0.048                                | 0.029                                      | 0.025                                   |
| INSTITUTIONALIZED, n = 148              |                        |                                   |                                  |                          |                        |                                       |                                            |                                         |
| Lutein, ( <i>trans+cis</i> )            | 0.047                  | -0.373 <sup>b</sup>               | 0.132                            | -0.045                   | 0.039                  | 0.100                                 | 0.321 <sup>b</sup>                         | 0.184 <sup>a</sup>                      |
| Zeaxanthin, ( <i>trans+cis</i> )        | 0.034                  | -0.250 <sup>c</sup>               | 0.093                            | 0.044                    | 0.097                  | 0.153                                 | 0.216 <sup>a</sup>                         | 0.213 <sup>a</sup>                      |
| Cryptoxanthin                           | 0.025                  | -0.107                            | 0.128                            | 0.083                    | 0.103                  | 0.1                                   | 0.194 <sup>a</sup>                         | 0.074                                   |
| $\alpha$ -Carotene                      | 0.007                  | -0.107                            | 0.064                            | 0.049                    | 0.041                  | 0.056                                 | 0.189 <sup>a</sup>                         | 0.068                                   |

|                                            |        |                     |        |        |        |        |       |                    |
|--------------------------------------------|--------|---------------------|--------|--------|--------|--------|-------|--------------------|
| $\beta$ -Carotene,<br>( <i>trans+cis</i> ) | 0.010  | -0.278 <sup>c</sup> | 0.154  | 0.004  | 0.075  | 0.131  | 0.151 | 0.190 <sup>a</sup> |
| Lycopene, ( <i>trans+cis</i> )             | -0.095 | -0.140              | -0.066 | -0.061 | -0.037 | -0.023 | 0.128 | 0.029              |
| $\alpha$ -Tocopherol                       | 0.086  | -0.198 <sup>a</sup> | 0.065  | 0.044  | 0.106  | 0.062  | 0.064 | 0.190 <sup>a</sup> |
| Retinol                                    | 0.075  | -0.059              | 0.134  | -0.010 | 0.087  | 0.030  | 0.070 | 0.177 <sup>a</sup> |

‡FOME: Fuld Object Memory Evaluation; <sup>2</sup>WAIS-III Similarities subtest: Wechsler Adult Intelligence Scale-III Similarities subtest

Significantly related ( $P <$ ): <sup>a</sup>0.05, <sup>b</sup>0.001, <sup>c</sup>0.01

**Table S5.** Characteristics of centenarian subjects in the analysis of brain analytes and cognition.

| Characteristics                                           | Total<br>n=47  | Global Deterioration Scale (GDRS) <sup>a</sup> |                |                |                | P value |
|-----------------------------------------------------------|----------------|------------------------------------------------|----------------|----------------|----------------|---------|
|                                                           |                | 1<br>n=5                                       | 2<br>n=7       | 3<br>n=11      | >3<br>n=24     |         |
| Age, y (mean $\pm$ SD)                                    | 101 $\pm$ 2    | 99 $\pm$ 1                                     | 100 $\pm$ 1    | 101 $\pm$ 2    | 101 $\pm$ 2    | 0.084   |
| Sex,                                                      |                |                                                |                |                |                |         |
| Male                                                      | 5              | 0                                              | 3              | 1              | 1              | 0.104   |
| Female                                                    | 42             | 5                                              | 4              | 10             | 23             |         |
| Race,                                                     |                |                                                |                |                |                |         |
| Caucasian                                                 | 42             | 5                                              | 7              | 10             | 20             | 0.901   |
| Black                                                     | 5              | 0                                              | 0              | 1              | 4              |         |
| Living,                                                   |                |                                                |                |                |                |         |
| Community dwelling                                        | 14             | 2                                              | 4              | 3              | 5              | 0.438   |
| Institutionalized                                         | 33             | 3                                              | 3              | 8              | 19             |         |
| Education (mean $\pm$ SD)<br>(highest grade completed, y) | 10.3 $\pm$ 4.0 | 11.6 $\pm$ 3.2                                 | 11.7 $\pm$ 4.0 | 10.6 $\pm$ 4.7 | 9.5 $\pm$ 3.8  | 0.515   |
| BMI, kg/m <sup>2</sup> (mean $\pm$ SD)                    | 22.7 $\pm$ 5.8 | 24.4 $\pm$ 5.6                                 | 22.8 $\pm$ 2.7 | 22.8 $\pm$ 3.1 | 22.3 $\pm$ 7.4 | 0.918   |
| Smoking (n)                                               |                |                                                |                |                |                |         |
| Never                                                     | 30             | 5                                              | 4              | 9              | 12             | 0.732   |
| Past                                                      | 4              | 0                                              | 2              | 1              | 1              |         |
| Present                                                   | 1              | 0                                              | 0              | 0              | 1              |         |
| Alcohol use (n)                                           |                |                                                |                |                |                |         |
| Never                                                     | 21             | 2                                              | 2              | 5              | 12             | 0.247   |
| Past                                                      | 6              | 2                                              | 2              | 1              | 1              |         |
| Present                                                   | 8              | 1                                              | 2              | 4              | 1              |         |
| Hypertension (n)                                          |                |                                                |                |                |                |         |
| Yes                                                       | 25             | 4                                              | 4              | 4              | 13             | 0.640   |
| No                                                        | 22             | 1                                              | 3              | 7              | 11             |         |
| Diabetes (n)                                              |                |                                                |                |                |                |         |
| Yes                                                       | 3              | 1                                              | 1              | 0              | 1              | 0.363   |
| No                                                        | 44             | 4                                              | 6              | 11             | 23             |         |

<sup>a</sup>GDRS=1: no subjective complaints or objective evidence of memory deficits; GDRS=2: subject complaints, but no objective evidence of memory deficits; GDRS=3: mild cognitive impairment and GDRS=4 to 7: different stages of dementia.

Subject characteristics were compared using one-way ANOVA, for categorical variables Fisher's exact test was used.



**REFERENCES** (Supplementary Material)

1. Folstein MR, Folstein SE. "Mini-Mental State" A Practical Method for Grading the Cognitive State of Patients for the Clinician. *Journal of Psychiatric Research* 1975;12.
2. Reisberg B, Ferris SH, de Leon MJ, Crook. T. The global deterioration scale for assessment of primary degenerative dementia. *American Journal of Psychiatry* 1982;139:1136-1139.
3. Panisset M, Roudier M, Saxton J, Boller F. Severe impairment battery. A neuropsychological test for severely demented patients. *Archives of Neurology* 1994;51:41-5.
4. Fuld PA. Fuld Object Memory Evaluation instruction manual. Wood Dale, IL: Stoetling, 1981.
5. Benton AL, Hamsher K. Multilingual aphasia examination. Iowa City, Iowa: University of Iowa, 1976.
6. Wechsler D. Wechsler Adult Intelligence Scale-III. San Antonio, Texas: The Psychological Corporation, 1997.
7. Grigsby J, Kaye K, Robbins LJ. Reliabilities, norms and factor structure of the Behavioral Dyscontrol Scale. *Perceptual & Motor Skills* 1992;74:883-92.
8. Sheikh JI, Yesavage JA. Geriatric Depression Scale:Recent evidence and development of a shorter version. *Clinical Gerontology: A Guide to Assessment and Intervention*. New York: The Haworth Press, 1986:165-173.
9. Loewenstein DA, Amigo E, Duara R, et al. A new scale for the assessment of functional status in Alzheimer's disease and related disorders. *Journal of Gerontology* 1989;44:P114-21.
10. Morris JC, Heyman A, Mohs RC, et al. The consortium to establish a registry for Alzheimer's disease (CERAD). Part I. Clinical and neuropsychological assessment of Alzheimer's disease. *Neurology* 1989;39:1159-1165.
